# Supplementary material for: A cobalt-doped hollow ZnS polyhedra@porous carbon shell composite anode for high-rate sodium-ion batteries
Source: Royal Society of Chemistry journal article supplement (doi:10.1039/d3nr03597b), 2023-01-01
Supplement: d3nr03597b1.pdf [file d3nr03597b1.pdf]

## Supporting Information

### **Cobalt-Doped Hollow ZnS Polyhedrons@Porous Carbon Shell Composite Anode for High-Rate Sodium-Ion Batteries**

Miaoxin Di, Zhenqi Song, Suhua Chen\*, and Ying Bai\*

\*Corresponding author. E-mail: [chenhnu0424@163.com](mailto:chenhnu0424@163.com); [ybai@henu.edu.cn](mailto:ybai@henu.edu.cn)

International Joint Research Laboratory of New Energy Materials and Devices of  
Henan Province, School of Physics and Electronics, Henan University, Kaifeng,  
475004, P. R. China

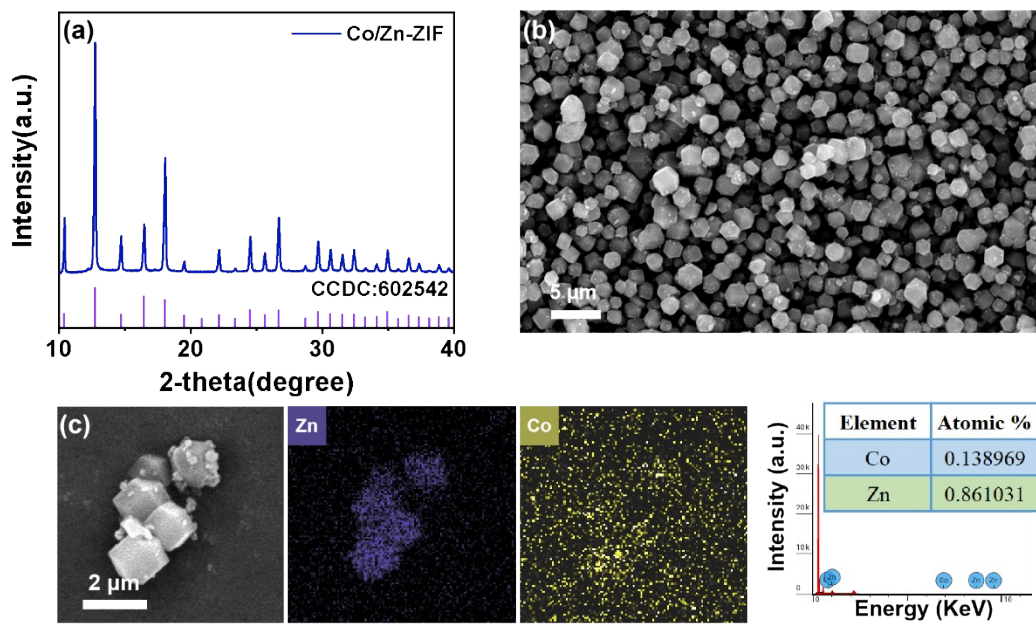

**Fig. S1** (a) XRD pattern, (b) SEM, and (c) Elemental mappings of Co/Zn-ZIF.

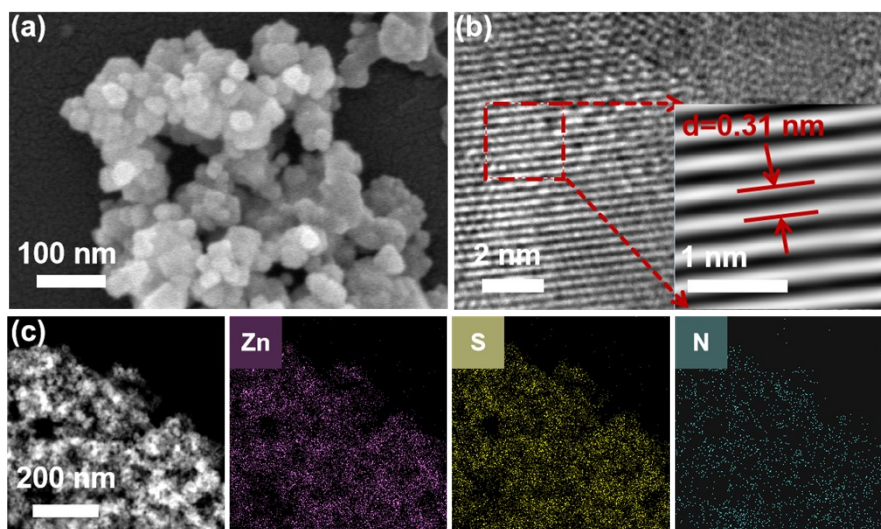

**Fig. S2** (a) SEM image, (b) HRTEM image, and (c) Elemental mappings of ZnS.

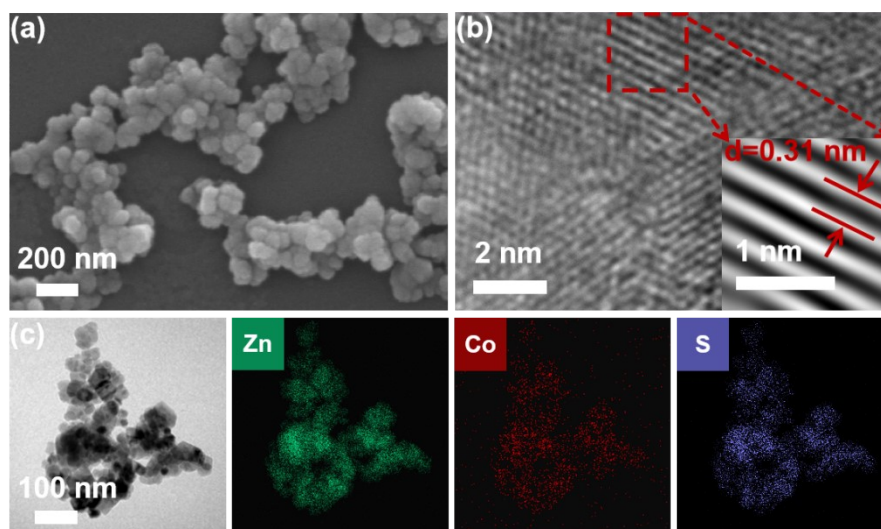

**Fig. S3** (a) SEM image, (b) HRTEM image, and (c) Elemental mappings of Co-ZnS.

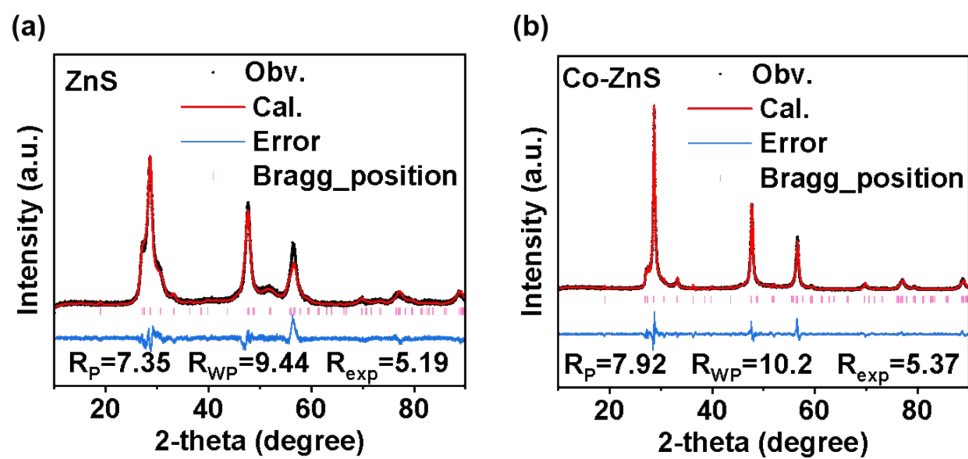

**Fig. S4** Rietveld refined XRD patterns of (a) ZnS and (b) Co-ZnS.

### **Details calculation of TGA.**

Since ZnS is fully converted to ZnO, the amount of ZnS is calculated according to the following formula:

$$ZnS/(wt\%) = \frac{M_{ZnS}}{M_{ZnO}} \times \frac{W_{ZnO}}{W_{Composite}(at\ 500^{\circ}C)} \times 100$$

Specifically,  $W_{ZnO}$  is the final weight of zinc oxide,  $W_{composite}$  is the total weight of the composite material (at 500°C), and  $M_{ZnS}$  and  $M_{ZnO}$  are the molecular weight of zinc sulfide and zinc oxide, respectively.

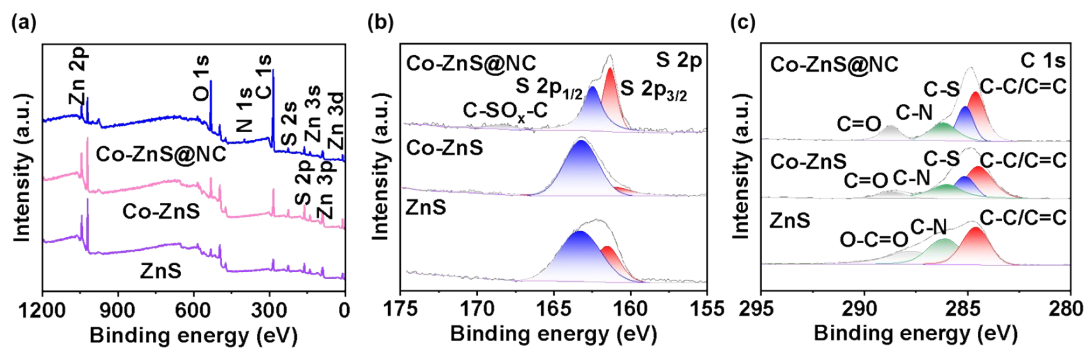

**Fig. S5** XPS tests of (a) survey spectra, (b) S 2p, and (c) C 1s of three samples.

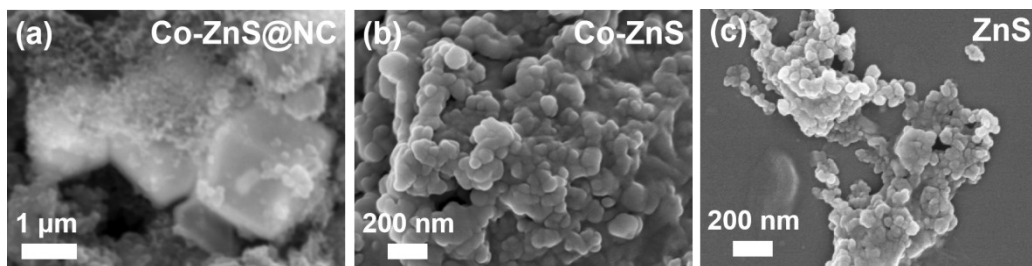

**Fig. S6** SEM images of (a) Co-ZnS@NC, (b) Co-ZnS, and (c) ZnS after 100 cycles at a current density of 0.5 A g<sup>-1</sup>.



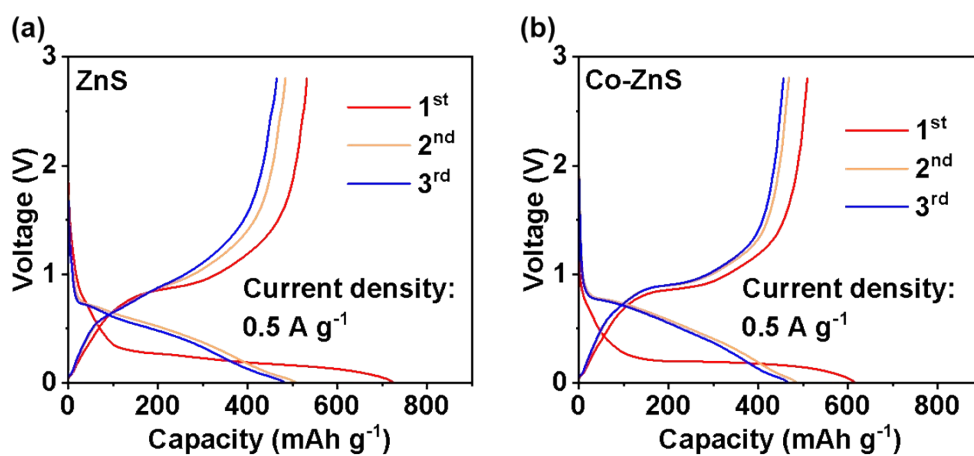

**Fig. S7** Charge-discharge curves of (a) ZnS and (b) Co-ZnS at 0.5 A g<sup>-1</sup>.

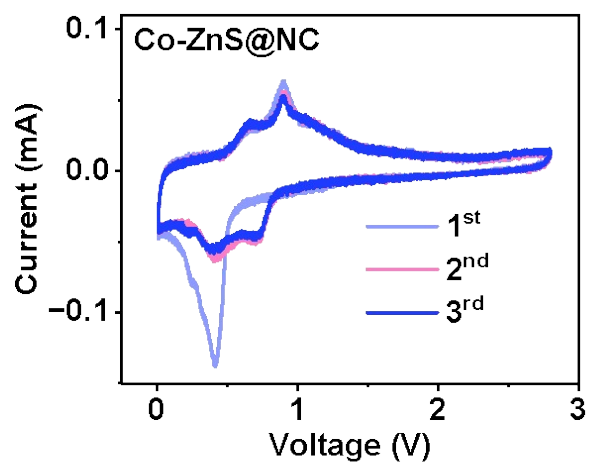

**Fig. S8** Cyclic voltammograms of Co-ZnS@NC at a scan rate of  $0.1 \text{ mV s}^{-1}$ .

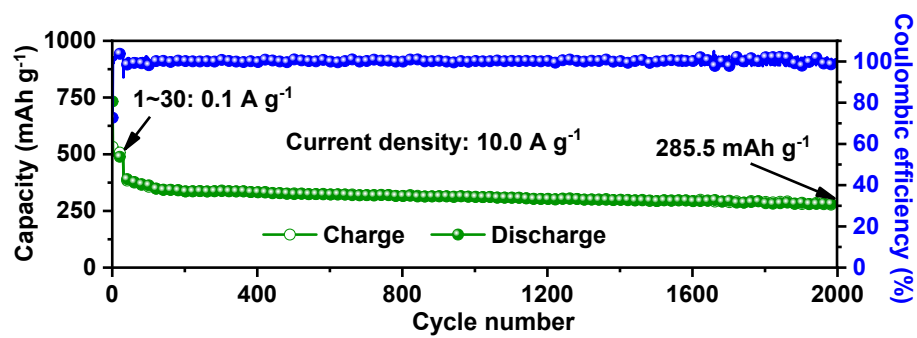

**Fig. S9** Cycling performance of Co-ZnS@NC at 10.0 A g<sup>-1</sup>.

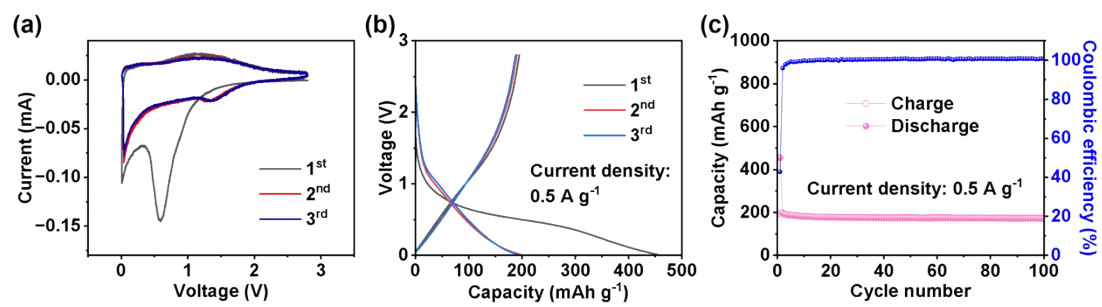

**Fig. S10** Electrochemical properties of NC anode (a) First three CV curves at 0.1 mV s<sup>-1</sup>, (b) Charge/discharge curves, (c) Cycling performance.

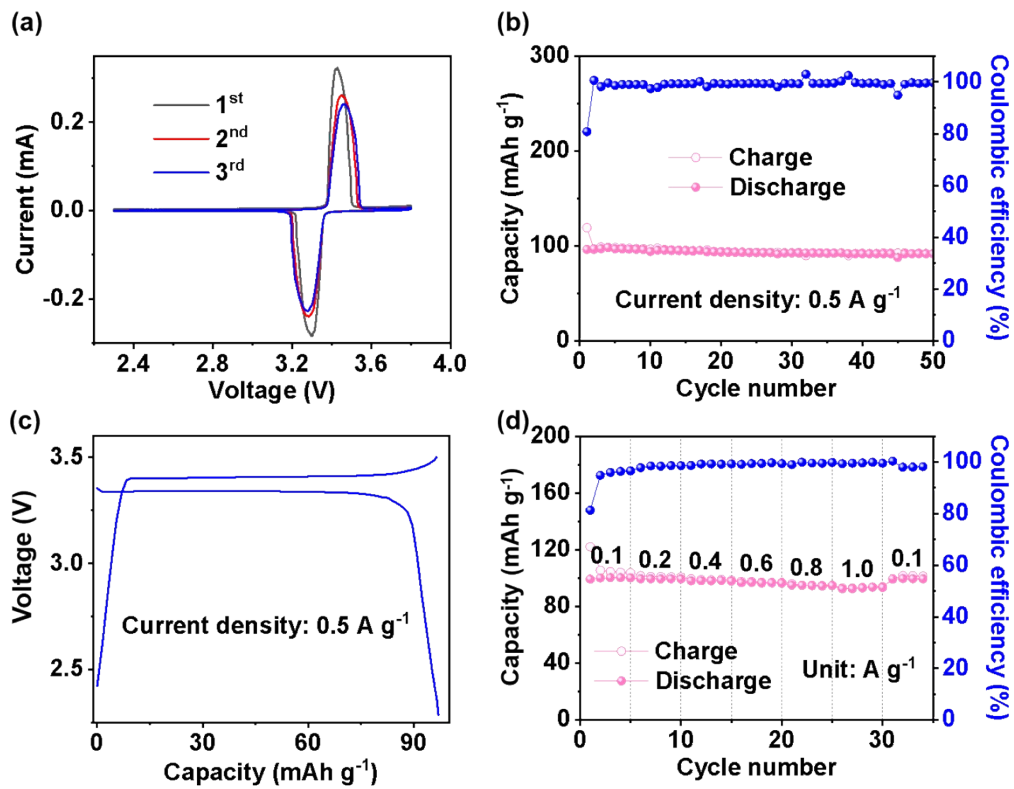

**Fig. S11** Electrochemical properties of NVP (a) First three CV curves at 0.1 mV s<sup>-1</sup>, (b) Cycling performance, (c) Charge/discharge curves, (d) Rate capability.

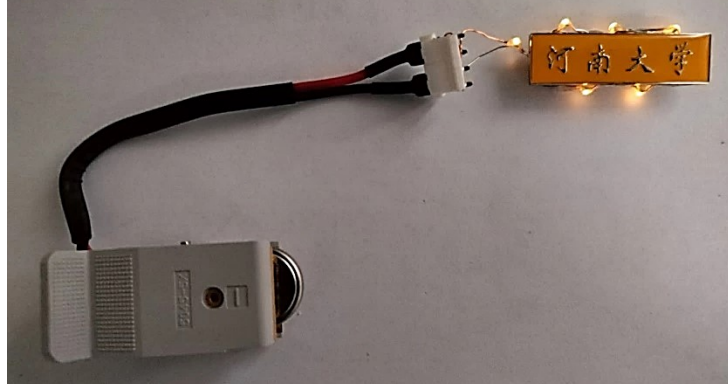

**Fig. S12** Light bulbs powered by full cell.

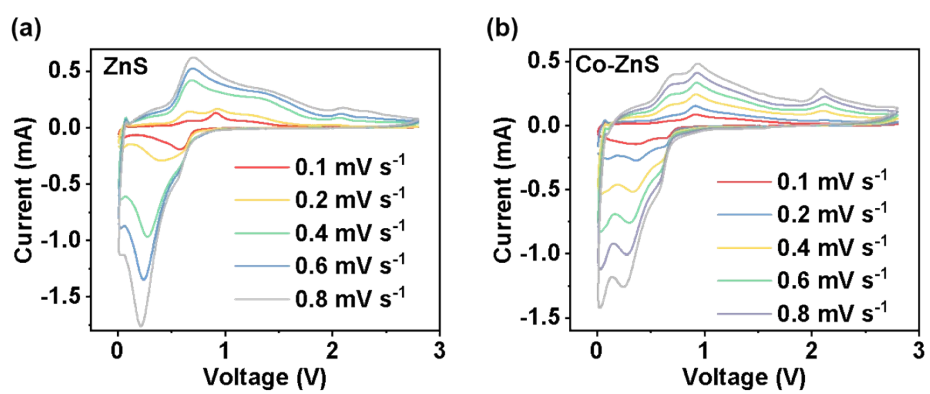

**Fig. S13** CV curves of (a) ZnS and (b) Co-ZnS.

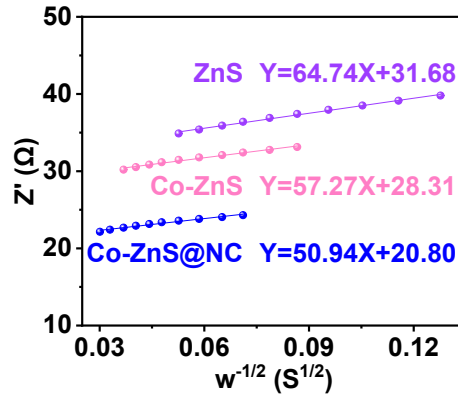

**Fig. S14** The relationship between  $Z''$  and  $\omega^{-1/2}$  in low-frequency regions of different anodes.

The sodium ion diffusion coefficients ( $D_{\text{Na}^+}$ ) of anode are calculated according to the following formula:

$$D = \frac{R^2 T^2}{2A^2 n^4 C^2 F^4 \sigma^4}$$

$$Z'' = R_e + R_{ct} + \sigma \omega^{-1/2}$$

where  $D$  represents the  $\text{Na}^+$  diffusion coefficient,  $A$  and  $n$  stand for the surface area and charge transfer number per molecule in the electrochemical reaction,  $F$  and  $C$  correspond to the Faraday constant and  $\text{Na}^+$  concentration,  $\sigma$  and  $\omega$  are the Warburg factor and angular frequency ( $\omega = 2\pi f$ ),  $R$  and  $T$  represent the gas constant and absolute temperature.



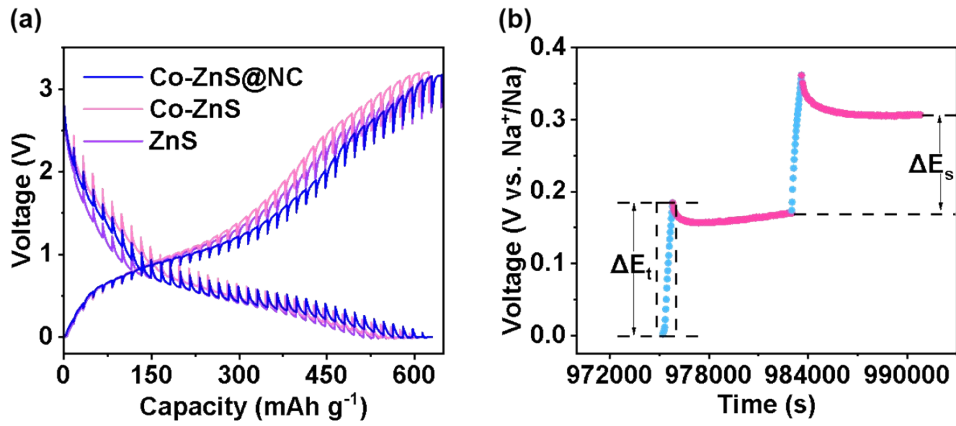

**Fig. S15** (a) GITT results of the three samples, and (b) the corresponding detailed diagram with a single current pulse for 10 min followed by an open-circuit for 120 min.

The diffusion coefficients of Na<sup>+</sup> in the Co-ZnS@NC anode are further calculated *via* GITT measurements, which can be calculated using the following equation:

$$D = \frac{4}{\pi\tau} \left( \frac{m_a V_m}{M_a S} \right)^2 \left( \frac{\Delta E_s}{\Delta E_\tau} \right)^2$$

in which  $\tau$  is the relaxation time,  $m_a$ ,  $M_a$ , and  $V_m$  are the mass, molar weight, and molar volume of the active materials, respectively.  $S$  is the contact area between electrode and electrolyte,  $\Delta E_s$  is the voltage change caused by the pulse current, and  $\Delta E_\tau$  is the voltage change during a constant current pulse, excluding the  $iR$  drop.

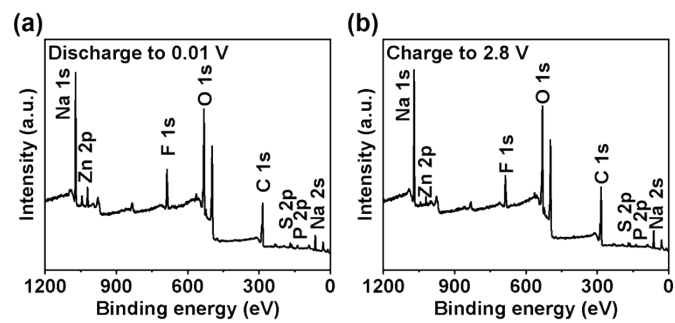

**Fig. S16** XPS survey spectra of Co-ZnS@NC at (a) discharge to 0.01 V and (b) charge to 2.8 V.

**Table S1** ICP analysis results for sample Co-ZnS@NC.

| Sample mass $m_0$ (g) | Test element | Sample elemental content W (%) |
|-----------------------|--------------|--------------------------------|
| 0.0446                | Co           | 0.58                           |
| 0.0446                | Zn           | 45.11                          |

**Table S2** Measured parameters derived from Rietveld refined XRD for three samples.

| Parameter           | ZnS     | Co-ZnS  | Co-ZnS@NC |
|---------------------|---------|---------|-----------|
| a (Å)               | 3.810   | 3.808   | 3.806     |
| b (Å)               | 3.810   | 3.808   | 3.806     |
| c (Å)               | 18.690  | 18.690  | 18.690    |
| V (Å <sup>3</sup> ) | 234.980 | 234.711 | 234.483   |

**Table S3** Peak area ratio of S 2p for XPS spectra of three samples.

| S 2p                | ZnS   | Co-ZnS | Co-ZnS@NC |
|---------------------|-------|--------|-----------|
| S 2p <sub>1/2</sub> | 69.4% | 82.8%  | 52.6%     |
| S 2p <sub>3/2</sub> | 30.6% | 17.2%  | 47.4%     |

**Table S4** ZnS-based anode reported for SIBs.

| Materials                               | Voltage (V) | Rate capability                 |                                       | Ref.      |
|-----------------------------------------|-------------|---------------------------------|---------------------------------------|-----------|
|                                         |             | Capacity (mAh g <sup>-1</sup> ) | Current density (mA g <sup>-1</sup> ) |           |
| CC-ZnS/CNT                              | 0.01-3.0    | 346.0                           | 5.0                                   | 7         |
| ZnIn <sub>2</sub> S <sub>4</sub>        | 0.01-2.5    | 394.3                           | 5.0                                   | 14        |
| Sb/ZnS@C                                | 0.01-1.8    | 214.3                           | 1.6                                   | 20        |
| ClO <sup>4-</sup> doped ZnS             | 0.01-3.0    | 203.0                           | 4.0                                   | 24        |
| ZnSnS <sub>3</sub>                      | 0.01-3.0    | 256.6                           | 2.0                                   | 25        |
| ZnS/CuS@C                               | 0.4-3.0     | 298.9                           | 10.0                                  | 26        |
| ZnS/NPC                                 | 0.01-3.0    | 182.4                           | 4.0                                   | 27        |
| ZnS/MWCNTs                              | 0.01-3.0    | 315.0                           | 5.0                                   | 28        |
| Fe <sub>7</sub> S <sub>8</sub> @ZnS/N-C | 0.01-3.0    | 337.6                           | 5.0                                   | 29        |
| Co-ZnS@NC                               | 0.01-2.8    | 368.8                           | 20.0                                  | This work |
